# Supplementary material for: Multiplexing strategy for simultaneous detection of redox-, phospho- and total proteome – understanding TOR regulating pathways in Chlamydomonas reinhardtii
Source: Royal Society of Chemistry journal article supplement (doi:10.1039/c5ay00521c), 2015-01-01
Supplement: c5ay00521c1.xlsx [file c5ay00521c1.xlsx]

## Sheet: top IAF
List of proteins identified from the spots showing a redox change. Spots highlighted in bold blue are also showing a change in protein abundance.
Biological pathway annotation is indicated by the following color coding:
	amino acid and protein metabolism					photosynthetic electron transport chain
	carbon fixation/Calvin Cycle					redox homeostasis
	citric acid cycle					respiratory electron transport chain
	lipid metabolism					transcription
	nucleotide and nucleotide-sugar metabolism					other
Spot #	protID #	accession numbers	emPAI	Fold change R/C	Anova (p)	gi accesion numbers	% alignment	E-value	bit score	protein description
913	43	Cre17.g698000.t1.2	3.6983	0.657244	0.026669	gi|159466892	100	0	927	beta subunit of mitochondrial ATP synthase [Chlamydomonas reinhardtii]
1068	1	Cre06.g263450.t1.2	13.711	1.52463	0.0498211	gi|159476938	100	0	1044	eukaryotic translation elongation factor 1 alpha 1 [Chlamydomonas reinhardtii]
899	1	Cre06.g263450.t1.2	1.60364	1.54314	0.0497356	gi|159476938	100	0	1044	eukaryotic translation elongation factor 1 alpha 1 [Chlamydomonas reinhardtii]
1068	7	Cre01.g050950.t1.2	2.1421	1.52463	0.0498211	gi|159464036	100	0	615	geranylgeranyl reductase [Chlamydomonas reinhardtii]
1433	236	Cre01.g047800.t1.1	0.36329	0.423885	0.0027895	gi|159463028	100	0	765	glutaredoxin, CGFS type [Chlamydomonas reinhardtii]
1433	286	Cre16.g688550.t1.2	0.68221	0.423885	0.0027895	gi|159482406	100	0	587	glutathione-S-transferase [Chlamydomonas reinhardtii]
1433	182	Cre26.g756797.t1.1	0.59369	0.423885	0.0027895	gi|307107838	75.66	4e-125	366	hypothetical protein CHLNCDRAFT_22624 [Chlorella variabilis]
913	363	Cre03.g197500.t1.2	0.70678	0.657244	0.026669	gi|302837512	61.09	9e-174	506	hypothetical protein VOLCADRAFT_120868 [Volvox carteri f
913	499	Cre01.g002400.t1.1	0.88361	0.657244	0.026669	gi|302844632	74.43	2e-74	256	hypothetical protein VOLCADRAFT_94625, partial [Volvox carteri f
1433	115	Cre16.g687900.t1.2	0.43065	0.423885	0.0027895	gi|27542569	100	0	587	light-harvesting complex I protein [Chlamydomonas reinhardtii]
899	160	Cre06.g251400.t1.2	0.60364	1.54314	0.0497356	gi|159476632	100	0	981	NADP-dependent malic enzyme [Chlamydomonas reinhardtii]
913	54	Cre09.g396213.t1.1	0.85449	0.657244	0.026669	gi|159473144	100	0	678	oxygen-evolving enhancer protein 1 of photosystem II [Chlamydomonas reinhardtii]
1433	198	Cre15.g636800.t1.1	0.31452	0.423885	0.0027895	gi|159485160	100	0	1132	predicted protein [Chlamydomonas reinhardtii]
899	103	Cre12.g514200.t1.2	0.81244	1.54314	0.0497356	gi|159490054	100	0	674	predicted protein [Chlamydomonas reinhardtii]

## Sheet: top ProQD
List of proteins identified from the spots showing a phosphorylation level change. Spots highlighted in bold green are also showing a change in protein abundance. Accession numbers highlighted with pink were identified with at least one phosphorylation site.
Biological pathway annotation is indicated by the following color coding:
	amino acid and protein metabolism					photosynthetic electron transport chain
	carbon fixation/Calvin Cycle					redox homeostasis
	citric acid cycle					respiratory electron transport chain
	lipid metabolism					transcription
	nucleotide and nucleotide-sugar metabolism					other
Spot #	protID #	accession numbers	emPAI	Fold change R/C	Anova (p)	gi accesion numbers	% alignment	E-value	bit score	protein description
1362	338	Cre14.g619550.t1.2	1.807	0.637569	0.0267179	gi|159464144	100	2e-112	338	20S proteasome alpha subunit G [Chlamydomonas reinhardtii]
1651	81	Cre03.g182450.t1.2	1.0221	0.35312	0.00225876	gi|159489876	100	0	687	5,10-methylenetetrahydrofolate dehydrogenase [Chlamydomonas reinhardtii]
1021	101	Cre02.g079300.t1.2	0.92185	2.67531	0.0348853	gi|159487319	100	0	880	AAA-ATPase of VPS4/SKD1 family [Chlamydomonas reinhardtii]
1273	41	Cre12.g520500.t1.1	1.0585	1.32069	0.0306108	gi|159477927	100	2e-69	220	acidic ribosomal protein P0 [Chlamydomonas reinhardtii]
1255	41	Cre12.g520500.t1.1	1.4924	1.61104	0.0353016	gi|159477927	100	2e-69	220	acidic ribosomal protein P0 [Chlamydomonas reinhardtii]
1267	41	Cre12.g520500.t1.1	1.9918	1.66048	0.0170568	gi|159477927	100	2e-69	220	acidic ribosomal protein P0 [Chlamydomonas reinhardtii]
1253	41	Cre12.g520500.t1.1	1.4924	1.87238	0.0315643	gi|159477927	100	2e-69	220	acidic ribosomal protein P0 [Chlamydomonas reinhardtii]
1021	58	Cre03.g188250.t1.2	1.114	2.67531	0.0348853	gi|159467349	100	0	577	ADP-glucose pyrophosphorylase small subunit [Chlamydomonas reinhardtii]
1040	120	Cre10.g451950.t1.2	0.73467	1.37669	0.019136	gi|159480896	100	2e-138	396	alanine aminotransferase [Chlamydomonas reinhardtii]
1585	42	Cre05.g248400.t1.2	0.46855	0.401379	0.0252634	gi|1737486	100	0	577	beta-carbonic anhydrase [Chlamydomonas reinhardtii]
1579	42	Cre05.g248400.t1.2	0.5736	0.459797	0.00256999	gi|1737486	100	0	577	beta-carbonic anhydrase [Chlamydomonas reinhardtii]
1564	42	Cre05.g248400.t1.2	0.25443	0.629575	0.0090397	gi|1737486	100	0	577	beta-carbonic anhydrase [Chlamydomonas reinhardtii]
1561	42	Cre05.g248400.t1.2	0.25443	0.641264	0.00807112	gi|1737486	100	0	577	beta-carbonic anhydrase [Chlamydomonas reinhardtii]
1597	179	Cre09.g393765.t1.1	1.0072	0.330865	0.0289324	gi|159473262	100	0	677	chitinase-related protein [Chlamydomonas reinhardtii]
1585	179	Cre09.g393765.t1.1	0.60453	0.401379	0.0252634	gi|159473262	100	0	677	chitinase-related protein [Chlamydomonas reinhardtii]
1626	179	Cre09.g393765.t1.1	1.1991	0.488995	0.00361022	gi|159473262	100	0	677	chitinase-related protein [Chlamydomonas reinhardtii]
1362	30.1	Cre03.g156900.t1.2	1.4015	0.637569	0.0267179	gi|159478875	100	0	1154	chlorophyll a-b binding protein of LHCII [Chlamydomonas reinhardtii]
1561	84	Cre11.g467569.t1.1	0.4771	0.641264	0.00807112	gi|159486703	100	3e-158	448	chloroplast ATP synthase delta chain [Chlamydomonas reinhardtii]
1651	51	Cre06.g259900.t1.2	1.2616	0.35312	0.00225876	gi|159476472	100	0	825	chloroplast ATP synthase gamma chain [Chlamydomonas reinhardtii]
1561	489	Cre16.g667750.t1.2	0.60359	0.641264	0.00807112	gi|159467891	100	0	1026	DNA-directed RNA polymerase II, 19 kDa polypeptide [Chlamydomonas reinhardtii]
1608	420	Cre02.g103550.t1.2	0.88551	0.525081	0.0334496	gi|159483465	100	0	1018	eukaryotic initiation factor [Chlamydomonas reinhardtii]
1131	65	Cre03.g199647.t1.1	2.0503	1.54405	0.0136094	gi|159482639	100	3e-178	507	eukaryotic initiation factor [Chlamydomonas reinhardtii]
1561	826	Cre08.g375950.t1.1	0.28405	0.641264	0.00807112	gi|159472492	98.55	1e-87	282	eukaryotic initiation factor, partial [Chlamydomonas reinhardtii]
1273	48	Cre11.g476750.t1.2	1.7873	1.32069	0.0306108	gi|159478523	100	2e-143	409	ferredoxin-nadp reductase [Chlamydomonas reinhardtii]
1267	48	Cre11.g476750.t1.2	0.93529	1.66048	0.0170568	gi|159478523	100	2e-143	409	ferredoxin-nadp reductase [Chlamydomonas reinhardtii]
1645	497	Cre16.g676645.t1.1	0.39224	1.63302	0.0405608	gi|159475565	100	0	701	flagellar associated protein [Chlamydomonas reinhardtii]
1651	21	Cre05.g234550.t1.2	1.0048	0.35312	0.00225876	gi|159485250	100	2e-97	288	fructose-1,6-bisphosphate aldolase [Chlamydomonas reinhardtii]
1585	257	Cre03.g197750.t1.2	0.37905	0.401379	0.0252634	gi|159470005	100	3e-156	443	glutathione peroxidase [Chlamydomonas reinhardtii]
1589	56	Cre10.g458450.t1.1	0.9841	0.38911	0.000554178	gi|159481010	100	0	951	glutathione peroxidase [Chlamydomonas reinhardtii]
1705	56	Cre10.g458450.t1.1	1.3548	0.450793	0.00174203	gi|159481010	100	0	951	glutathione peroxidase [Chlamydomonas reinhardtii]
1626	56	Cre10.g458450.t1.1	0.47379	0.488995	0.00361022	gi|159481010	100	0	951	glutathione peroxidase [Chlamydomonas reinhardtii]
1640	56	Cre10.g458450.t1.1	5.5811	0.519721	0.0201527	gi|159481010	100	0	951	glutathione peroxidase [Chlamydomonas reinhardtii]
1564	56	Cre10.g458450.t1.1	0.40858	0.629575	0.0090397	gi|159481010	100	0	951	glutathione peroxidase [Chlamydomonas reinhardtii]
1651	20	Cre01.g010900.t1.2	4.6274	0.35312	0.00225876	gi|159463282	100	0	1016	glyceraldehyde-3-phosphate dehydrogenase [Chlamydomonas reinhardtii]
1273	20	Cre01.g010900.t1.2	0.55782	1.32069	0.0306108	gi|159463282	100	0	1016	glyceraldehyde-3-phosphate dehydrogenase [Chlamydomonas reinhardtii]
1597	80	Cre09.g392350.t1.2	0.76333	0.330865	0.0289324	gi|159472653	100	0	706	glycine-rich RNA-binding protein [Chlamydomonas reinhardtii]
1585	80	Cre09.g392350.t1.2	0.53467	0.401379	0.0252634	gi|159472653	100	0	706	glycine-rich RNA-binding protein [Chlamydomonas reinhardtii]
1631	80	Cre09.g392350.t1.2	0.45956	0.42256	0.00254464	gi|159472653	100	0	706	glycine-rich RNA-binding protein [Chlamydomonas reinhardtii]
1626	80	Cre09.g392350.t1.2	1.3552	0.488995	0.00361022	gi|159472653	100	0	706	glycine-rich RNA-binding protein [Chlamydomonas reinhardtii]
1640	430	Cre15.g641600.t1.2	1.1098	0.519721	0.0201527	gi|159490201	100	0	970	hypothetical protein CHLREDRAFT_123392, partial [Chlamydomonas reinhardtii]
1131	50	Cre13.g604650.t1.2	1.7023	1.54405	0.0136094	gi|159482130	100	0	847	hypothetical protein CHLREDRAFT_139416 [Chlamydomonas reinhardtii]
1626	646	Cre06.g278211.t1.1	0.60819	0.488995	0.00361022	gi|159479996	100	0	854	hypothetical protein CHLREDRAFT_185073 [Chlamydomonas reinhardtii]
1255	79	Cre16.g672750.t1.2	1.0395	1.61104	0.0353016	gi|159475617	100	0	636	hypothetical protein CHLREDRAFT_191517 [Chlamydomonas reinhardtii]
1630	594	Cre14.g616250.t1.2	0.28683	0.330643	0.0289261	gi|159481901	100	0	704	hypothetical protein CHLREDRAFT_205606 [Chlamydomonas reinhardtii]
1221	85	Cre02.g099850.t1.1	2.2154	1.43765	0.00132766	gi|302837967	89.55	0	682	hypothetical protein VOLCADRAFT_104783 [Volvox carteri f
1362	329	Cre14.g626900.t1.2	1.2109	0.637569	0.0267179	gi|302828828	87.76	3e-151	433	hypothetical protein VOLCADRAFT_109528 [Volvox carteri f
1579	763	Cre13.g578150.t1.2	0.37958	0.459797	0.00256999	gi|302835499	83.52	3e-106	314	hypothetical protein VOLCADRAFT_120739 [Volvox carteri f
1579	553	Cre07.g321300.t1.2	0.33234	0.459797	0.00256999	gi|302839505	65.26	4e-76	238	hypothetical protein VOLCADRAFT_120959 [Volvox carteri f
1273	282	Cre08.g384900.t1.2	0.70014	1.32069	0.0306108	gi|302845680	86.33	0	1056	hypothetical protein VOLCADRAFT_76279 [Volvox carteri f
1040	29	Cre08.g359350.t1.2	1.0896	1.37669	0.019136	gi|302851507	89.69	0	853	hypothetical protein VOLCADRAFT_77540 [Volvox carteri f
1273	63	Cre06.g294950.t1.1	0.89236	1.32069	0.0306108	gi|302849386	87.17	0	557	hypothetical protein VOLCADRAFT_83516 [Volvox carteri f
1255	63	Cre06.g294950.t1.1	0.75932	1.61104	0.0353016	gi|302849386	87.17	0	557	hypothetical protein VOLCADRAFT_83516 [Volvox carteri f
1267	63	Cre06.g294950.t1.1	1.0675	1.66048	0.0170568	gi|302849386	87.17	0	557	hypothetical protein VOLCADRAFT_83516 [Volvox carteri f
1564	183	Cre07.g344950.t1.2	0.72357	0.629575	0.0090397	gi|159468772	100	0	843	light-harvesting protein of photosystem I [Chlamydomonas reinhardtii]
1131	49	Cre06.g307500.t1.1	1.5432	1.54405	0.0136094	gi|159466052	100	0	1003	low-CO2 inducible protein [Chlamydomonas reinhardtii]
1273	17	Cre12.g483950.t1.2	0.66152	1.32069	0.0306108	gi|159490405	100	2e-143	409	malate dehydrogenase [Chlamydomonas reinhardtii]
1253	55	Cre03.g194850.t1.2	1.1722	1.87238	0.0315643	gi|159469941	100	0	577	malate dehydrogenase [Chlamydomonas reinhardtii]
1253	204	Cre07.g338050.t1.2	0.89045	1.87238	0.0315643	gi|159484062	100	0	520	mitochondrial F1F0 ATP synthase associated 36
1705	582	Cre12.g560200.t1.2	0.74435	0.450793	0.00174203	gi|159490334	100	0	958	N-acetyltransferase [Chlamydomonas reinhardtii]
1597	820	Cre03.g146247.t1.1	0.42326	0.330865	0.0289324	gi|159474980	100	0	624	NADH:ubiquinone oxidoreductase 18 kDa subunit [Chlamydomonas reinhardtii]
1589	471	Cre02.g100200.t1.2	0.51901	0.38911	0.000554178	gi|159483537	100	0	816	NADH:ubiquinone oxidoreductase 22 kDa subunit [Chlamydomonas reinhardtii]
1608	159	Cre12.g509050.t1.1	0.34906	0.525081	0.0334496	gi|159465647	100	0	586	OEE2-like protein of thylakoid lumen [Chlamydomonas reinhardtii]
1705	44	Cre08.g372450.t1.2	1.0418	0.450793	0.00174203	gi|159486609	100	0	733	oxygen evolving enhancer protein 3 [Chlamydomonas reinhardtii]
1608	44	Cre08.g372450.t1.2	0.6233	0.525081	0.0334496	gi|159486609	100	0	733	oxygen evolving enhancer protein 3 [Chlamydomonas reinhardtii]
1645	44	Cre08.g372450.t1.2	0.33047	1.63302	0.0405608	gi|159486609	100	0	733	oxygen evolving enhancer protein 3 [Chlamydomonas reinhardtii]
1362	54	Cre09.g396213.t1.1	1.5254	0.637569	0.0267179	gi|159473144	100	0	678	oxygen-evolving enhancer protein 1 of photosystem II [Chlamydomonas reinhardtii]
1599	53	Cre01.g002300.t1.2	0.96068	0.277115	0.000625844	gi|159484660	100	2e-123	356	peptidyl-prolyl cis-trans isomerase, cyclophilin-type [Chlamydomonas reinhardtii]
1597	53	Cre01.g002300.t1.2	2.8443	0.330865	0.0289324	gi|159484660	100	2e-123	356	peptidyl-prolyl cis-trans isomerase, cyclophilin-type [Chlamydomonas reinhardtii]
1585	53	Cre01.g002300.t1.2	1.1429	0.401379	0.0252634	gi|159484660	100	2e-123	356	peptidyl-prolyl cis-trans isomerase, cyclophilin-type [Chlamydomonas reinhardtii]
1626	163	Cre12.g495951.t1.1	0.93912	0.488995	0.00361022	gi|159485018	100	2e-95	283	peptidyl-prolyl cis-trans isomerase, cyclophilin-type [Chlamydomonas reinhardtii]
1631	331	Cre10.g466850.t1.1	0.65694	0.42256	0.00254464	gi|159481152	100	3e-158	448	peptidyl-prolyl cis-trans isomerase, FKBP-type [Chlamydomonas reinhardtii]
1705	264	Cre10.g454250.t1.2	1.399	0.450793	0.00174203	gi|159480568	99.31	8e-81	256	peptidyl-prolyl cis-trans isomerase, FKBP-type, partial [Chlamydomonas reinhardtii]
1640	264	Cre10.g454250.t1.2	1.1171	0.519721	0.0201527	gi|159480568	99.31	8e-81	256	peptidyl-prolyl cis-trans isomerase, FKBP-type, partial [Chlamydomonas reinhardtii]
1645	303	Cre01.g014350.t1.2	1.0942	1.63302	0.0405608	gi|159462450	100	0	926	peroxiredoxin, type II [Chlamydomonas reinhardtii]
1131	25	Cre11.g467770.t1.1	1.0418	1.54405	0.0136094	gi|159482940	100	0	962	phosphoglycerate kinase [Chlamydomonas reinhardtii]
1597	68	Cre09.g412100.t1.2	1.1743	0.330865	0.0289324	gi|159477399	100	0	1135	photosystem I reaction center subunit III [Chlamydomonas reinhardtii]
1626	68	Cre09.g412100.t1.2	0.55131	0.488995	0.00361022	gi|159477399	100	0	1135	photosystem I reaction center subunit III [Chlamydomonas reinhardtii]
1273	59	Cre16.g663900.t1.2	0.95309	1.32069	0.0306108	gi|159486921	100	0	791	porphobilinogen deaminase [Chlamydomonas reinhardtii]
1267	59	Cre16.g663900.t1.2	0.8091	1.66048	0.0170568	gi|159486921	100	0	791	porphobilinogen deaminase [Chlamydomonas reinhardtii]
1705	397	Cre03.g208000.t1.1	0.60531	0.450793	0.00174203	gi|159470035	100	0	888	predicted protein [Chlamydomonas reinhardtii]
1589	355	Cre09.g395800.t1.2	0.41144	0.38911	0.000554178	gi|159472725	96.39	2e-110	323	predicted protein [Chlamydomonas reinhardtii]
1585	147	Cre11.g468750.t1.2	0.53367	0.401379	0.0252634	gi|159482900	100	0	942	predicted protein [Chlamydomonas reinhardtii]
1626	147	Cre11.g468750.t1.2	0.53367	0.488995	0.00361022	gi|159482900	100	0	942	predicted protein [Chlamydomonas reinhardtii]
1564	312	Cre12.g542350.t1.2	0.9841	0.629575	0.0090397	gi|159471556	100	0	660	predicted protein [Chlamydomonas reinhardtii]
1561	312	Cre12.g542350.t1.2	0.40858	0.641264	0.00807112	gi|159471556	100	0	660	predicted protein [Chlamydomonas reinhardtii]
1579	548	Cre15.g635200.t1.2	1.0523	0.459797	0.00256999	gi|159485122	98.25	1e-70	233	predicted protein [Chlamydomonas reinhardtii]
1273	86	Cre09.g387171.t1.1	1.0402	1.32069	0.0306108	gi|159473821	100	6e-100	316	predicted protein [Chlamydomonas reinhardtii]
1645	215	Cre15.g636050.t1.2	0.26599	1.63302	0.0405608	gi|159485188	100	0	966	predicted protein [Chlamydomonas reinhardtii]
1267	292	Cre03.g195200.t1.2	0.61645	1.66048	0.0170568	gi|159470259	100	0	697	predicted protein [Chlamydomonas reinhardtii]
1585	388	Cre03.g208050.t1.2	0.90779	0.401379	0.0252634	gi|159470033	100	0	837	predicted protein, partial [Chlamydomonas reinhardtii]
1564	200	Cre16.g678851.t1.1	0.67923	0.629575	0.0090397	gi|159475735	100	0	760	PsbP-like protein [Chlamydomonas reinhardtii]
1561	200	Cre16.g678851.t1.1	1.2918	0.641264	0.00807112	gi|159475735	100	0	760	PsbP-like protein [Chlamydomonas reinhardtii]
1631	40	Cre12.g550850.t1.2	0.27344	0.42256	0.00254464	gi|131389	100	2e-142	406	RecName: Full=Oxygen-evolving enhancer protein 2, chloroplastic; Short=OEE2; Flags: Precursor [Chlamydomonas reinhardtii]
1579	40	Cre12.g550850.t1.2	2.7791	0.459797	0.00256999	gi|131389	100	2e-142	406	RecName: Full=Oxygen-evolving enhancer protein 2, chloroplastic; Short=OEE2; Flags: Precursor [Chlamydomonas reinhardtii]
1564	40	Cre12.g550850.t1.2	0.27344	0.629575	0.0090397	gi|131389	100	2e-142	406	RecName: Full=Oxygen-evolving enhancer protein 2, chloroplastic; Short=OEE2; Flags: Precursor [Chlamydomonas reinhardtii]
1255	40	Cre12.g550850.t1.2	0.82998	1.61104	0.0353016	gi|131389	100	2e-142	406	RecName: Full=Oxygen-evolving enhancer protein 2, chloroplastic; Short=OEE2; Flags: Precursor [Chlamydomonas reinhardtii]
1645	246	Cre12.g560950.t1.2	0.58158	1.63302	0.0405608	gi|131191	100	8e-132	378	RecName: Full=Photosystem I reaction center subunit V, chloroplastic; AltName: Full=Light-harvesting complex I 10 kDa protein; AltName: Full=P35 protein; AltName: Full=PSI-G; Flags: Precursor [Chlamydomonas reinhardtii]
1645	450	Cre07.g352550.t1.2	0.80431	1.63302	0.0405608	gi|159468904	100	0	997	rhodanese domain phosphatase [Chlamydomonas reinhardtii]
1362	114	Cre03.g187450.t1.2	1.1462	0.637569	0.0267179	gi|159467673	100	0	1120	ribose-5-phosphate isomerase [Chlamydomonas reinhardtii]
1597	672	Cre01.g040000.t1.2	0.75057	0.330865	0.0289324	gi|159462890	100	0	765	ribosomal protein L26, component of cytosolic 80S ribosome and 60S large subunit [Chlamydomonas reinhardtii]
1705	57	Cre02.g120100.t1.2	0.56887	0.450793	0.00174203	gi|159488841	100	0	1140	ribulose-1,5-bisphosphate carboxylase/oxygenase small subunit 1, chloroplast precursor [Chlamydomonas reinhardtii]
1645	57	Cre02.g120100.t1.2	0.56887	1.63302	0.0405608	gi|159488841	100	0	1140	ribulose-1,5-bisphosphate carboxylase/oxygenase small subunit 1, chloroplast precursor [Chlamydomonas reinhardtii]
1564	256	Cre11.g467689.t1.1	0.33423	0.629575	0.0090397	gi|159481438	100	0	885	rieske iron-sulfur subunit of the cytochrome b6f complex, chloroplast precursor [Chlamydomonas reinhardtii]
1021	52	Cre06.g250200.t1.2	0.95547	2.67531	0.0348853	gi|159477124	100	0	577	S-Adenosylmethionine synthetase [Chlamydomonas reinhardtii]
1579	342	Cre02.g142687.t1.1	0.57253	0.459797	0.00256999	gi|159465365	100	0	785	small ARF-related GTPase [Chlamydomonas reinhardtii]
1626	472	Cre10.g422300.t1.2	0.92634	0.488995	0.00361022	gi|159489214	100	0	590	thioredoxin dependent peroxidase [Chlamydomonas reinhardtii]
1705	697	Cre12.g554850.t1.2	0.46317	0.450793	0.00174203	gi|159472028	100	2e-76	245	thioredoxin h2 [Chlamydomonas reinhardtii]
1640	740	Cre12.g496700.t1.2	0.57999	0.519721	0.0201527	gi|159488809	100	0	803	thioredoxin-like protein [Chlamydomonas reinhardtii]
1040	6	Cre10.g451900.t1.1	0.79516	1.37669	0.019136	gi|159480894	100	0	978	threonine synthase [Chlamydomonas reinhardtii]
1705	106	Cre09.g404000.t1.1	0.51005	0.450793	0.00174203	gi|159474024	100	0	1012	thylakoid lumenal 17
1049	45	Cre12.g523850.t1.2	1.831	1.51404	0.000441769	gi|159477849	100	1e-176	497	ubiquinol:cytochrome c oxidoreductase 50 kDa core 1 subunit [Chlamydomonas reinhardtii]
1021	45	Cre12.g523850.t1.2	1.0012	2.67531	0.0348853	gi|159477849	100	1e-176	497	ubiquinol:cytochrome c oxidoreductase 50 kDa core 1 subunit [Chlamydomonas reinhardtii]
1273	137	Cre03.g169400.t1.2	0.78701	1.32069	0.0306108	gi|159491066	100	0	592	UDP-D-glucuronic acid decarboxylase [Chlamydomonas reinhardtii]
1021	35.1	Cre06.g278185.t1.1	0.82807	2.67531	0.0348853	gi|159479860	100	0	854	UDP-glucose dehydrogenase [Chlamydomonas reinhardtii]
1362	197	Cre13.g583550.t1.2	3.0226	0.637569	0.0267179	gi|159471371	100	1e-130	375	vesicle inducing protein in plastids 1 [Chlamydomonas reinhardtii]

## Sheet: top sypro
List of proteins identified from the spots showing a protein abundance change. Spots highlighted in bold green and blue bare also showing a change in phosphorylation and redox level, respectively.
Biological pathway annotation is indicated by the following color coding:
	amino acid and protein metabolism					photosynthetic electron transport chain
	carbon fixation/Calvin Cycle					redox homeostasis
	citric acid cycle					respiratory electron transport chain
	lipid metabolism					transcription
	nucleotide and nucleotide-sugar metabolism					other
Spot #	protID #	accession numbers	emPAI	Fold change R/C	Anova (p)	gi accesion numbers	% alignment	E-value	bit score	protein description
1384	174	Cre17.g705400.t1.2	0.97922	1.16601	0.0442334	gi|159467074	100	1e-147	423	20S proteasome alpha subunit A [Chlamydomonas reinhardtii]
1319	174	Cre17.g705400.t1.2	0.40685	1.37942	0.0250087	gi|159467074	100	1e-147	423	20S proteasome alpha subunit A [Chlamydomonas reinhardtii]
1362	338	Cre14.g619550.t1.2	1.807	0.743691	0.0217287	gi|159464144	100	2e-112	338	20S proteasome alpha subunit G [Chlamydomonas reinhardtii]
1087	83	Cre14.g625400.t1.1	1.2257	1.20082	0.00102838	gi|159469321	100	0	620	26S proteasome regulatory subunit [Chlamydomonas reinhardtii]
1480	92	Cre02.g114600.t1.2	2.1511	0.785547	0.0133836	gi|159483223	100	0	828	2-cys peroxiredoxin [Chlamydomonas reinhardtii]
1172	230	Cre17.g709850.t1.2	1.0717	1.42953	0.0219577	gi|159466992	99.75	0	635	acetate kinase, partial [Chlamydomonas reinhardtii]
1253	41	Cre12.g520500.t1.1	1.4924	1.17044	0.0253954	gi|159477927	100	2e-69	220	acidic ribosomal protein P0 [Chlamydomonas reinhardtii]
1093	73	Cre17.g734100.t1.2	1.432	1.22581	0.000770621	gi|159469564	100	0	782	adenylosuccinate synthase [Chlamydomonas reinhardtii]
1319	479	Cre03.g180151.t1.1	0.36479	1.37942	0.0250087	gi|159490576	100	0	956	armadillo/beta-catenin-like repeat family protein [Chlamydomonas reinhardtii]
1025	5	Cre10.g461350.t1.1	0.61589	1.24688	0.0489818	gi|159480690	95.9	0	531	basal body protein [Chlamydomonas reinhardtii]
1561	42	Cre05.g248400.t1.2	0.25443	0.583458	0.00110493	gi|1737486	100	0	577	beta-carbonic anhydrase [Chlamydomonas reinhardtii]
1558	42	Cre05.g248400.t1.2	0.40498	0.658314	0.000764956	gi|1737486	100	0	577	beta-carbonic anhydrase [Chlamydomonas reinhardtii]
1564	42	Cre05.g248400.t1.2	0.25443	0.801699	0.0220701	gi|1737486	100	0	577	beta-carbonic anhydrase [Chlamydomonas reinhardtii]
1319	42	Cre05.g248400.t1.2	0.40498	1.37942	0.0250087	gi|1737486	100	0	577	beta-carbonic anhydrase [Chlamydomonas reinhardtii]
1065	224	Cre01.g038400.t1.2	0.71099	0.85812	0.00149117	gi|159462862	100	0	559	calreticulin 2, calcium-binding protein [Chlamydomonas reinhardtii]
1480	457	Cre02.g092850.t1.2	0.75556	0.785547	0.0133836	gi|159162680	100	2e-138	395	Chain A, Relaxation-Based Refined Structure Of Chlamydomonas Outer Arm Dynein Light Chain 1
1625	179	Cre09.g393765.t1.1	0.32142	0.819348	0.0249935	gi|159473262	100	0	677	chitinase-related protein [Chlamydomonas reinhardtii]
1362	30.1	Cre03.g156900.t1.2	1.4015	0.743691	0.0217287	gi|159478875	100	0	1154	chlorophyll a-b binding protein of LHCII [Chlamydomonas reinhardtii]
1392	30.1	Cre03.g156900.t1.2	0.729	0.876964	0.0292122	gi|159478875	100	0	1154	chlorophyll a-b binding protein of LHCII [Chlamydomonas reinhardtii]
1561	84	Cre11.g467569.t1.1	0.4771	0.583458	0.00110493	gi|159486703	100	3e-158	448	chloroplast ATP synthase delta chain [Chlamydomonas reinhardtii]
1558	84	Cre11.g467569.t1.1	1.4848	0.658314	0.000764956	gi|159486703	100	3e-158	448	chloroplast ATP synthase delta chain [Chlamydomonas reinhardtii]
1480	84	Cre11.g467569.t1.1	1.1818	0.785547	0.0133836	gi|159486703	100	3e-158	448	chloroplast ATP synthase delta chain [Chlamydomonas reinhardtii]
1554	84	Cre11.g467569.t1.1	0.34184	0.808349	0.0172049	gi|159486703	100	3e-158	448	chloroplast ATP synthase delta chain [Chlamydomonas reinhardtii]
1065	227	Cre04.g231026.t1.1	0.7328	0.85812	0.00149117	gi|442571676	99.77	0	1906	chloroplast SRP43 [Chlamydomonas reinhardtii]
1625	732	Cre12.g558900.t1.2	0.5838	0.819348	0.0249935	gi|159489663	100	5e-103	302	cytochrome b6f complex subunit V [Chlamydomonas reinhardtii]
1319	134	Cre16.g656300.t1.1	0.76062	1.37942	0.0250087	gi|159479502	100	0	679	dihydrodipicolinate reductase [Chlamydomonas reinhardtii]
1025	2	Cre18.g749847.t1.1	1.1979	1.24688	0.0489818	gi|159474092	100	5e-169	478	dihydrolipoyl dehydrogenase [Chlamydomonas reinhardtii]
1561	489	Cre16.g667750.t1.2	0.60359	0.583458	0.00110493	gi|159467891	100	0	1026	DNA-directed RNA polymerase II, 19 kDa polypeptide [Chlamydomonas reinhardtii]
1561	826	Cre08.g375950.t1.1	0.28405	0.583458	0.00110493	gi|159472492	98.55	1e-87	282	eukaryotic initiation factor, partial [Chlamydomonas reinhardtii]
939	1	Cre06.g263450.t1.2	0.64906	0.7477	0.0250675	gi|159476938	100	0	1044	eukaryotic translation elongation factor 1 alpha 1 [Chlamydomonas reinhardtii]
1025	1	Cre06.g263450.t1.2	1.3997	1.24688	0.0489818	gi|159476938	100	0	1044	eukaryotic translation elongation factor 1 alpha 1 [Chlamydomonas reinhardtii]
1068	1	Cre06.g263450.t1.2	13.711	1.25547	0.0434691	gi|159476938	100	0	1044	eukaryotic translation elongation factor 1 alpha 1 [Chlamydomonas reinhardtii]
1392	209	Cre17.g742300.t1.1	1.1309	0.876964	0.0292122	gi|159486191	99.54	0	621	flagellar associated protein [Chlamydomonas reinhardtii]
1113	185	Cre02.g141350.t1.2	1.9588	0.903315	0.0222248	gi|159473445	100	0	1308	flagellar associated protein [Chlamydomonas reinhardtii]
1319	216	Cre16.g674300.t1.1	0.96449	1.37942	0.0250087	gi|159475433	100	0	758	flagellar associated protein [Chlamydomonas reinhardtii]
1181	181	Cre16.g679550.t1.1	0.19768	1.21898	0.0367521	gi|159475749	100	0	544	flagellar associated protein, protease inhibitor-like protein [Chlamydomonas reinhardtii]
1223	21	Cre05.g234550.t1.2	7.1161	0.878942	0.0390009	gi|159485250	100	2e-97	288	fructose-1,6-bisphosphate aldolase [Chlamydomonas reinhardtii]
1068	7	Cre01.g050950.t1.2	2.1421	1.25547	0.0434691	gi|159464036	100	0	615	geranylgeranyl reductase [Chlamydomonas reinhardtii]
1564	56	Cre10.g458450.t1.1	0.40858	0.801699	0.0220701	gi|159481010	100	0	951	glutathione peroxidase [Chlamydomonas reinhardtii]
1625	56	Cre10.g458450.t1.1	0.9841	0.819348	0.0249935	gi|159481010	100	0	951	glutathione peroxidase [Chlamydomonas reinhardtii]
1640	56	Cre10.g458450.t1.1	5.5811	1.49959	0.000558277	gi|159481010	100	0	951	glutathione peroxidase [Chlamydomonas reinhardtii]
939	20	Cre01.g010900.t1.2	0.60188	0.7477	0.0250675	gi|159463282	100	0	1016	glyceraldehyde-3-phosphate dehydrogenase [Chlamydomonas reinhardtii]
1223	20	Cre01.g010900.t1.2	2.4598	0.878942	0.0390009	gi|159463282	100	0	1016	glyceraldehyde-3-phosphate dehydrogenase [Chlamydomonas reinhardtii]
1558	80	Cre09.g392350.t1.2	0.45956	0.658314	0.000764956	gi|159472653	100	0	706	glycine-rich RNA-binding protein [Chlamydomonas reinhardtii]
1554	80	Cre09.g392350.t1.2	0.53467	0.808349	0.0172049	gi|159472653	100	0	706	glycine-rich RNA-binding protein [Chlamydomonas reinhardtii]
1625	80	Cre09.g392350.t1.2	0.76333	0.819348	0.0249935	gi|159472653	100	0	706	glycine-rich RNA-binding protein [Chlamydomonas reinhardtii]
1392	77	Cre01.g032300.t1.2	0.91028	0.876964	0.0292122	gi|159463672	100	0	815	G-strand telomere binding protein 1 [Chlamydomonas reinhardtii]
1446	520	Cre16.g675450.t2.1	0.92139	1.21887	0.0306342	gi|159475459	84.78	8e-125	363	hypothetical protein CHLREDRAFT_103881 [Chlamydomonas reinhardtii]
1640	430	Cre15.g641600.t1.2	1.1098	1.49959	0.000558277	gi|159490201	100	0	970	hypothetical protein CHLREDRAFT_123392, partial [Chlamydomonas reinhardtii]
1789	648	Cre07.g327350.t1.2	1.0313	2.01456	0.0199722	gi|159464481	100	0	775	hypothetical protein CHLREDRAFT_156470 [Chlamydomonas reinhardtii]
1319	367	Cre12.g503650.t1.2	0.45807	1.37942	0.0250087	gi|159465551	100	0	716	hypothetical protein CHLREDRAFT_169636 [Chlamydomonas reinhardtii]
1025	4	Cre04.g218500.t1.2	0.62519	1.24688	0.0489818	gi|159468165	83.3	0	1215	hypothetical protein CHLREDRAFT_170899 [Chlamydomonas reinhardtii]
1065	400	Cre06.g269650.t1.2	0.44426	0.85812	0.00149117	gi|159476268	100	0	977	hypothetical protein CHLREDRAFT_182288 [Chlamydomonas reinhardtii]
1065	279	Cre16.g682800.t1.2	0.32512	0.85812	0.00149117	gi|159467459	92.73	0	949	hypothetical protein CHLREDRAFT_189279 [Chlamydomonas reinhardtii]
1630	594	Cre14.g616250.t1.2	0.28683	0.776324	0.0349853	gi|159481901	100	0	704	hypothetical protein CHLREDRAFT_205606 [Chlamydomonas reinhardtii]
1446	177	Cre03.g198950.t1.2	0.72196	1.21887	0.0306342	gi|159470187	100	7e-180	506	hypothetical protein CHLREDRAFT_205900 [Chlamydomonas reinhardtii]
1384	88	Cre03.g156250.t1.2	4.1595	1.16601	0.0442334	gi|302837351	87.94	2e-126	369	hypothetical protein VOLCADRAFT_104626 [Volvox carteri f
1221	85	Cre02.g099850.t1.1	2.2154	1.20902	0.00789044	gi|302837967	89.55	0	682	hypothetical protein VOLCADRAFT_104783 [Volvox carteri f
1087	31.1	Cre07.g344400.t1.2	3.3305	1.20082	0.00102838	gi|302850341	80.58	0	707	hypothetical protein VOLCADRAFT_107347 [Volvox carteri f
1087	31.2	Cre07.g344550.t1.2	2.8409	1.20082	0.00102838	gi|302850341	80.58	0	843	hypothetical protein VOLCADRAFT_107347 [Volvox carteri f
1093	31.2	Cre07.g344550.t1.2	2.8409	1.22581	0.000770621	gi|302850341	80.58	0	843	hypothetical protein VOLCADRAFT_107347 [Volvox carteri f
1362	329	Cre14.g626900.t1.2	1.2109	0.743691	0.0217287	gi|302828828	87.76	3e-151	433	hypothetical protein VOLCADRAFT_109528 [Volvox carteri f
939	519	Cre16.g662852.t1.1	1.6962	0.7477	0.0250675	gi|302852727	89.66	6e-27	110	hypothetical protein VOLCADRAFT_84238 [Volvox carteri f
1113	131	Cre04.g214500.t1.1	1.1674	0.903315	0.0222248	gi|159481269	99.52	0	1215	isocitrate dehydrogenase, NADP-dependent [Chlamydomonas reinhardtii]
1564	183	Cre07.g344950.t1.2	0.72357	0.801699	0.0220701	gi|159468772	100	0	843	light-harvesting protein of photosystem I [Chlamydomonas reinhardtii]
1392	97	Cre07.g328200.t1.2	0.94724	0.876964	0.0292122	gi|159464835	100	0	543	lumen targeted protein [Chlamydomonas reinhardtii]
1480	151	Cre08.g362900.t1.1	1.6218	0.785547	0.0133836	gi|159476000	98.85	0	892	lumenal PsbP-like protein [Chlamydomonas reinhardtii]
1165	47	Cre06.g306300.t1.2	6.0736	1.43873	0.01328	gi|159466070	100	0	557	magnesium chelatase subunit I [Chlamydomonas reinhardtii]
1253	55	Cre03.g194850.t1.2	1.1722	1.17044	0.0253954	gi|159469941	100	0	577	malate dehydrogenase [Chlamydomonas reinhardtii]
1253	204	Cre07.g338050.t1.2	0.89045	1.17044	0.0253954	gi|159484062	100	0	520	mitochondrial F1F0 ATP synthase associated 36
1113	117	Cre09.g415550.t1.2	1.3469	0.903315	0.0222248	gi|159477287	100	0	802	mitochondrial F1F0 ATP synthase associated 45
1472	142	Cre16.g691000.t1.2	1.1895	0.687291	0.0280532	gi|159482564	98.91	4e-126	365	organellar elongation factor P [Chlamydomonas reinhardtii]
1392	142	Cre16.g691000.t1.2	0.92139	0.876964	0.0292122	gi|159482564	98.91	4e-126	365	organellar elongation factor P [Chlamydomonas reinhardtii]
1113	123	Cre12.g560900.t1.2	1.8178	0.903315	0.0222248	gi|159490354	100	0	1156	oxidoreductase-like protein [Chlamydomonas reinhardtii]
1362	54	Cre09.g396213.t1.1	1.5254	0.743691	0.0217287	gi|159473144	100	0	678	oxygen-evolving enhancer protein 1 of photosystem II [Chlamydomonas reinhardtii]
1625	53	Cre01.g002300.t1.2	0.65694	0.819348	0.0249935	gi|159484660	100	2e-123	356	peptidyl-prolyl cis-trans isomerase, cyclophilin-type [Chlamydomonas reinhardtii]
1599	53	Cre01.g002300.t1.2	0.96068	1.41509	0.0491204	gi|159484660	100	2e-123	356	peptidyl-prolyl cis-trans isomerase, cyclophilin-type [Chlamydomonas reinhardtii]
1625	331	Cre10.g466850.t1.1	0.65694	0.819348	0.0249935	gi|159481152	100	3e-158	448	peptidyl-prolyl cis-trans isomerase, FKBP-type [Chlamydomonas reinhardtii]
1640	264	Cre10.g454250.t1.2	1.1171	1.49959	0.000558277	gi|159480568	99.31	8e-81	256	peptidyl-prolyl cis-trans isomerase, FKBP-type, partial [Chlamydomonas reinhardtii]
1181	25	Cre11.g467770.t1.1	0.13858	1.21898	0.0367521	gi|159482940	100	0	962	phosphoglycerate kinase [Chlamydomonas reinhardtii]
1172	25	Cre11.g467770.t1.1	1.1787	1.42953	0.0219577	gi|159482940	100	0	962	phosphoglycerate kinase [Chlamydomonas reinhardtii]
1625	68	Cre09.g412100.t1.2	0.2955	0.819348	0.0249935	gi|159477399	100	0	1135	photosystem I reaction center subunit III [Chlamydomonas reinhardtii]
1392	69	Cre05.g237450.t1.2	1.0056	0.876964	0.0292122	gi|159479306	99.65	0	839	plastid-specific ribosomal protein 1 [Chlamydomonas reinhardtii]
1384	69	Cre05.g237450.t1.2	1.4469	1.16601	0.0442334	gi|159479306	99.65	0	839	plastid-specific ribosomal protein 1 [Chlamydomonas reinhardtii]
1065	112	Cre03.g182551.t1.2	0.5069	0.85812	0.00149117	gi|159489946	100	0	851	plastocyanin, chloroplast precursor [Chlamydomonas reinhardtii]
1561	312	Cre12.g542350.t1.2	0.40858	0.583458	0.00110493	gi|159471556	100	0	660	predicted protein [Chlamydomonas reinhardtii]
1558	312	Cre12.g542350.t1.2	0.67175	0.658314	0.000764956	gi|159471556	100	0	660	predicted protein [Chlamydomonas reinhardtii]
1472	198	Cre15.g636800.t1.1	0.98117	0.687291	0.0280532	gi|159485160	100	0	1132	predicted protein [Chlamydomonas reinhardtii]
939	103	Cre12.g514200.t1.2	0.81244	0.7477	0.0250675	gi|159490054	100	0	674	predicted protein [Chlamydomonas reinhardtii]
1480	180	Cre13.g573250.t1.2	1.3063	0.785547	0.0133836	gi|159471217	100	0	698	predicted protein [Chlamydomonas reinhardtii]
1564	312	Cre12.g542350.t1.2	0.9841	0.801699	0.0220701	gi|159471556	100	0	660	predicted protein [Chlamydomonas reinhardtii]
1625	147	Cre11.g468750.t1.2	0.45976	0.819348	0.0249935	gi|159482900	100	0	942	predicted protein [Chlamydomonas reinhardtii]
1065	295	Cre07.g338400.t1.1	0.65258	0.85812	0.00149117	gi|159484146	100	0	1273	predicted protein [Chlamydomonas reinhardtii]
1446	148	Cre13.g564050.t1.1	0.729	1.21887	0.0306342	gi|159470535	100	8e-132	378	predicted protein [Chlamydomonas reinhardtii]
1319	124	Cre01.g031100.t1.2	0.53292	1.37942	0.0250087	gi|159463656	100	0	803	predicted protein [Chlamydomonas reinhardtii]
1384	128	Cre01.g033550.t1.2	0.98989	1.16601	0.0442334	gi|159462776	100	0	559	protein disulfide isomerase [Chlamydomonas reinhardtii]
1561	200	Cre16.g678851.t1.1	1.2918	0.583458	0.00110493	gi|159475735	100	0	760	PsbP-like protein [Chlamydomonas reinhardtii]
1558	200	Cre16.g678851.t1.1	0.86265	0.658314	0.000764956	gi|159475735	100	0	760	PsbP-like protein [Chlamydomonas reinhardtii]
1564	200	Cre16.g678851.t1.1	0.67923	0.801699	0.0220701	gi|159475735	100	0	760	PsbP-like protein [Chlamydomonas reinhardtii]
1558	40	Cre12.g550850.t1.2	0.82998	0.658314	0.000764956	gi|131389	100	2e-142	406	RecName: Full=Oxygen-evolving enhancer protein 2, chloroplastic; Short=OEE2; Flags: Precursor [Chlamydomonas reinhardtii]
1472	40	Cre12.g550850.t1.2	1.3304	0.687291	0.0280532	gi|131389	100	2e-142	406	RecName: Full=Oxygen-evolving enhancer protein 2, chloroplastic; Short=OEE2; Flags: Precursor [Chlamydomonas reinhardtii]
1480	40	Cre12.g550850.t1.2	1.6298	0.785547	0.0133836	gi|131389	100	2e-142	406	RecName: Full=Oxygen-evolving enhancer protein 2, chloroplastic; Short=OEE2; Flags: Precursor [Chlamydomonas reinhardtii]
1564	40	Cre12.g550850.t1.2	0.27344	0.801699	0.0220701	gi|131389	100	2e-142	406	RecName: Full=Oxygen-evolving enhancer protein 2, chloroplastic; Short=OEE2; Flags: Precursor [Chlamydomonas reinhardtii]
1446	40	Cre12.g550850.t1.2	1.3304	1.21887	0.0306342	gi|131389	100	2e-142	406	RecName: Full=Oxygen-evolving enhancer protein 2, chloroplastic; Short=OEE2; Flags: Precursor [Chlamydomonas reinhardtii]
1446	599	Cre02.g111450.t1.2	0.59969	1.21887	0.0306342	gi|159483749	100	0	1018	rhodanese-like protein [Chlamydomonas reinhardtii]
1362	114	Cre03.g187450.t1.2	1.1462	0.743691	0.0217287	gi|159467673	100	0	1120	ribose-5-phosphate isomerase [Chlamydomonas reinhardtii]
1625	805	Cre02.g115200.t1.2	0.45251	0.819348	0.0249935	gi|159483211	100	0	805	ribosomal protein L27a, component of cytosolic 80S ribosome and 60S large subunit [Chlamydomonas reinhardtii]
1789	57	Cre02.g120100.t1.2	0.97262	2.01456	0.0199722	gi|159488841	100	0	1140	ribulose-1,5-bisphosphate carboxylase/oxygenase small subunit 1, chloroplast precursor [Chlamydomonas reinhardtii]
1558	256	Cre11.g467689.t1.1	0.54116	0.658314	0.000764956	gi|159481438	100	0	885	rieske iron-sulfur subunit of the cytochrome b6f complex, chloroplast precursor [Chlamydomonas reinhardtii]
1564	256	Cre11.g467689.t1.1	0.33423	0.801699	0.0220701	gi|159481438	100	0	885	rieske iron-sulfur subunit of the cytochrome b6f complex, chloroplast precursor [Chlamydomonas reinhardtii]
1025	3	Cre16.g664550.t1.2	0.95143	1.24688	0.0489818	gi|159486853	100	1e-110	323	serine hydroxymethyltransferase [Chlamydomonas reinhardtii]
1446	405	Cre09.g408200.t1.2	0.75556	1.21887	0.0306342	gi|159477341	100	0	850	SR protein factor [Chlamydomonas reinhardtii]
1172	100	Cre12.g500500.t1.1	1.3862	1.42953	0.0219577	gi|159465129	95.56	0	899	sterol-C24-methyltransferase [Chlamydomonas reinhardtii]
1625	472	Cre10.g422300.t1.2	0.33614	0.819348	0.0249935	gi|159489214	100	0	590	thioredoxin dependent peroxidase [Chlamydomonas reinhardtii]
1640	740	Cre12.g496700.t1.2	0.57999	1.49959	0.000558277	gi|159488809	100	0	803	thioredoxin-like protein [Chlamydomonas reinhardtii]
1558	232	Cre05.g243050.t1.2	0.59552	0.658314	0.000764956	gi|302854651	70.76	7e-80	247	thioredoxin-like protein [Volvox carteri f
1025	6	Cre10.g451900.t1.1	0.59692	1.24688	0.0489818	gi|159480894	100	0	978	threonine synthase [Chlamydomonas reinhardtii]
1558	193	Cre03.g198850.t1.2	0.42242	0.658314	0.000764956	gi|159470481	100	0	795	thylakoid lumen protein [Chlamydomonas reinhardtii]
1392	60	Cre01.g029300.t1.2	3.3134	0.876964	0.0292122	gi|159463610	100	0	803	triose phosphate isomerase [Chlamydomonas reinhardtii]
1319	46	Cre17.g734500.t1.2	0.43065	1.37942	0.0250087	gi|159469570	100	0	973	vacuolar ATP synthase subunit E [Chlamydomonas reinhardtii]
1362	197	Cre13.g583550.t1.2	3.0226	0.743691	0.0217287	gi|159471371	100	1e-130	375	vesicle inducing protein in plastids 1 [Chlamydomonas reinhardtii]
